# Supplementary material for: One-Hour Plasma Glucose Identifies Insulin Resistance and β-Cell Dysfunction in Individuals With Normal Glucose Tolerance: Cross-sectional data from the Relationship between Insulin Sensitivity and Cardiovascular Risk (RISC) study
Source: PubMed Central journal article supplement — Diabetes Care. 2010 Sep;33(9):2090–7. doi: 10.2337/dc09-2261 (PMC2928370; doi:10.2337/dc09-2261), 2010-09
Supplement: supp_dc09-2261_dc092261Onlineappendix.pdf [file supp_dc09-2261_dc092261Onlineappendix.pdf]

**ACKNOWLEDGEMENTS** The RISC Study is partly supported by EU grant QLG1-CT-2001-01252. Additional support for the RISC Study has been provided by AstraZeneca (Sweden). Dr. R. Catalini (Ancona, Italy) is thanked for his advice and help in preparing the carotid ultrasound protocol. The EGIR Group is supported by Merck Santé (France).

### **EGIR-RISC Study Group**

**Project Management Board:** B. Balkau, S.W. Coppack, J.M. Dekker, E. Ferrannini, A. Golay, A. Mari, A. Natali, J.R. Petrie, M. Walker.

### **RISC Recruiting centres**

*Amsterdam, The Netherlands:* R.J. Heine, J. Dekker, G. Nijpels, W. Boorsma. *Athens, Greece:* A. Mitrakou, S. Liatis, K. Kyriakopoulou. *Belgrade, Yugoslavia:* N. Lalic, K. Lalic, A. Jotic, L. Lukic, M. Civcic. *Dublin, Ireland:* J. Nolan, T.P. Yeow, M. Murphy, C. DeLong, G. Neary, M.P. Colgan. *Frankfurt, Germany:* T. Konrad, H. Böhles, S. Fuellert, F. Baer, H. Zuchhold. *Geneva, Switzerland:* A. Golay, V. Barthassat, V. Makoundou, T.N.O. Lehmann, E. Harsch Bobbioni, T. Merminod. *Glasgow, Scotland:* J.R. Petrie, C. Perry, F. Neary, C. MacDougall, K. Shields, L. Malcolm. *Kuopio, Finland:* M. Laakso, U. Salmenniemi, A. Aura, R. Raisanen, U. Ruotsalainen, T. Sistonen, M. Laitinen. *London, England:* S. Coppack, P. McIntosh, G. Hood, P. Khadobaksh. *Lyon, France:* M. Laville, A. Brac de la Perriere, C. Louche-Pelissier, C. Maitrepierre, J. Peyrat, A. Serusclat. *Madrid, Spain:* R. Gabriel, E.M. Sánchez, R. Carraro, A. Frieria, B. Novella. *Malmö, Sweden (1):* P. Nilsson, M. Persson, G. Östling, (2): O. Melander, P. Burri. *Milan, Italy:* P.M. Piatti, L.D. Monti, E. Setola, F. Minicucci, A. Colleluori. *Newcastle-upon-Tyne, England:* M. Walker, I.M. Ibrahim, D. Carman, Y. McGrady, D. L. Richardson. *Odense, Denmark:* H. Beck-Nielsen, P. Staehr, K. Hojlund, V. Jensen, C. Olsen. *Perugia, Italy:* G.B. Bolli, F. Porcellati, C. Fanelli, M. Romolini, F. Calcinaro, A. Saturni. *Pisa, Italy:* E. Ferrannini, A. Natali, E. Muscelli, S. Pinnola, M. Kozakova. *Rome, Italy:* G. Mingrone, P. Di Rocco, A. Favuzzi. *Vienna, Austria:* W. Waldhäusl, M. Roden, C. Anderwald, A. Hofer.

**Core laboratories and reading centres:** *Lipids (Dublin, Ireland):* J. Nolan, P. Gaffney. *Hormones (Odense, Denmark):* H. Beck-Nielsen, C. Olsen, L. Hansen. *Albumin:creatinine (Amsterdam, The Netherlands):* J. Dekker, A. Kok; *Genetics (Newcastle-upon-Tyne, UK):* M. Walker. *Stable glucose isotope (Pisa, Italy):* A. Gastaldelli, D. Ciociaro. *Ultrasound reading centre (Pisa, Italy):* E. Ferrannini, M. Kozakova. *ECG reading centre (Amsterdam, The Netherlands):* J. Dekker, G. Nijpels.

**Coordinating office:** *Pisa, Italy,* E. Ferrannini, L. Mota, L. Landucci. **Data management:** *Villejuif, France,* B. Balkau, L. Mhamdi; *Padova, Italy:* A. Mari; *Pisa, Italy:* L. Mota **Mathematical modelling and website management:** *Padova, Italy,* A. Mari, G. Pacini, C. Cavaggion.

Further information on the RISC project and participating centres can be found on <http://www.egir.org>.

**Table 1S: Pearson correlation coefficients (*r*) with one-hour plasma glucose (1hPG) and two-hour plasma glucose (2hPG) levels following a 75 g oral glucose tolerance test.**

| Parameter                      | Unit of Measurements                                                                                | 1hPG  |        | 2hPG  |        |
|--------------------------------|-----------------------------------------------------------------------------------------------------|-------|--------|-------|--------|
|                                |                                                                                                     | r     | P      | r     | P      |
| <i>Insulin sensitivity</i>     | [log( $\mu\text{mol}\cdot\text{min}^{-1}\cdot\text{kg}_{\text{FFM}}^{-1}\cdot\text{nmol/l}^{-1}$ )] | -0.31 | <0.001 | -0.32 | <0.001 |
| <i>Insulin clearance</i>       | (1/min/m <sup>2</sup> )                                                                             | -0.05 | 0.112  | -0.06 | 0.054  |
| <i>Basal insulin secretion</i> | (pmol·min <sup>-1</sup> ·m <sup>-2</sup> )                                                          | 0.30  | <0.001 | 0.24  | <0.001 |
| <i>Total insulin secretion</i> | (nmol·m <sup>-2</sup> )                                                                             | 0.43  | <0.001 | 0.35  | <0.001 |
| <i>Hepatic insulin</i>         | (adimensional)                                                                                      | -0.11 | <0.001 | -0.10 | <0.001 |
| <i>Glucose Sensitivity</i>     | (pmol·min <sup>-1</sup> ·m <sup>-2</sup> ·mM <sup>-1</sup> )                                        | -0.46 | <0.001 | -0.26 | <0.001 |
| <i>Rate Sensitivity</i>        | (pmol·m <sup>-2</sup> ·mM <sup>-1</sup> )                                                           | -0.18 | <0.001 | -0.11 | 0.001  |
| <i>Potential factor</i>        | (fold)                                                                                              | -0.18 | <0.001 | -0.36 | <0.001 |
